# Supplementary material for: Unprecedented formation of 2-oxaspiro[bicyclo[2.2.1]heptane-6,3′-indoline] derivatives from reaction of 3-phenacyalideneoxindole with malononitrile or ethyl cyanoacetate
Source: Royal Society of Chemistry journal article supplement (doi:10.1039/c4ra06272h), 2014-09-12
Supplement: c4ra06272h2.pdf [file c4ra06272h2.pdf]

Table of contents

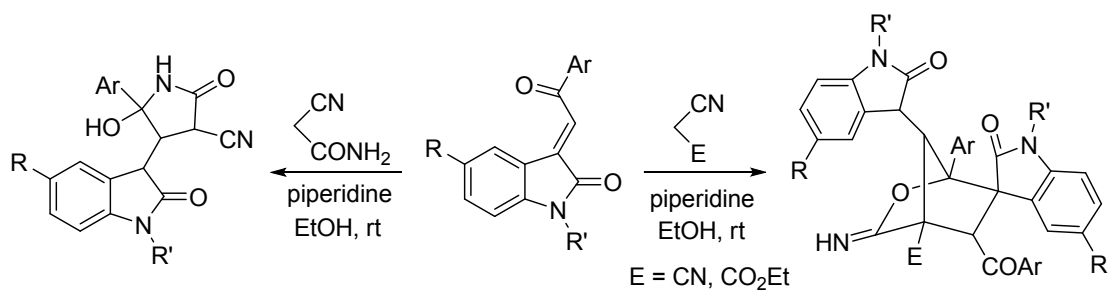

Molecular diversity of reaction of 3-phenacylideneoxindole with malononitrile and its derivatives
